# Supplementary material for: A long wavelength fluorescent probe for biothiols and its application in cell imaging
Source: Royal Society of Chemistry journal article supplement (doi:10.1039/c6ay02150f), 2016-01-01
Supplement: c6ay02150f1.pdf [file c6ay02150f1.pdf]

## Electronic Supplementary Information

### A long wavelength fluorescent probe for biothiols and its application in cell imaging

Jiawei Li, <sup>a</sup>§ Caixia Yin, <sup>\*a</sup> Yongbin Zhang, <sup>b</sup> Jianbin Chao, <sup>b</sup> Fangjun Huo <sup>\*b</sup>

<sup>a</sup> *Institute of Molecular Science, Key Laboratory of Materials for Energy Conversion and Storage of Shanxi Province, Shanxi University, Taiyuan 030006, China.*

<sup>b</sup> *Research Institute of Applied Chemistry, Shanxi University, Taiyuan, 030006, China.*

**Figure S1:** <sup>1</sup>H NMR, <sup>13</sup>C NMR, and ESI-MS of the probe **1**.

**Figure S2:** The photostabilities of probe **1** and probe **1**-Cys.

**Figure S3:** Kinetic study of the response of probe **1** to Hcy and GSH at 25 °C.

**Figure S4:** The detection limits of Cys, Hcy and GSH.

**Figure S5:** The ESI-MS of product obtained by reaction between probe **1** and ME.

**Figure S6:** NMR spectra of the probe **1**-ME.

**Figure S1:**  $^1\text{H}$  NMR,  $^{13}\text{C}$  NMR, and ESI-MS of the probe **1**.

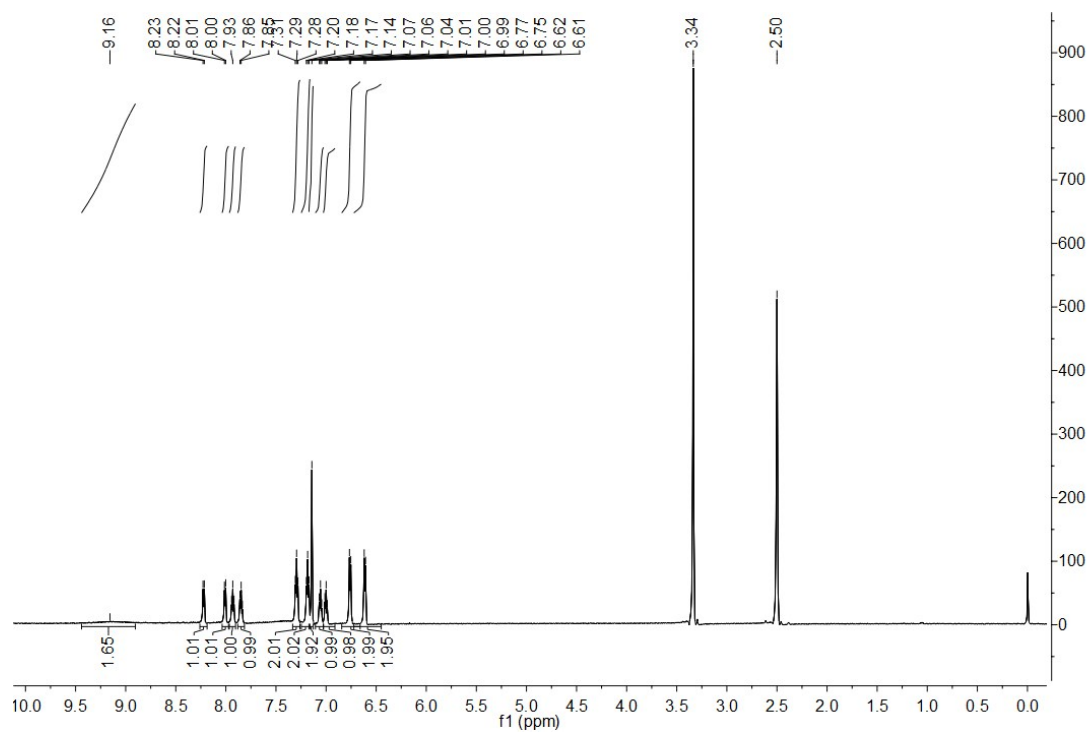

The  $^1\text{H}$  NMR (600MHz) spectra of the probe **1** in  $\text{DMSO}-d_6$ .

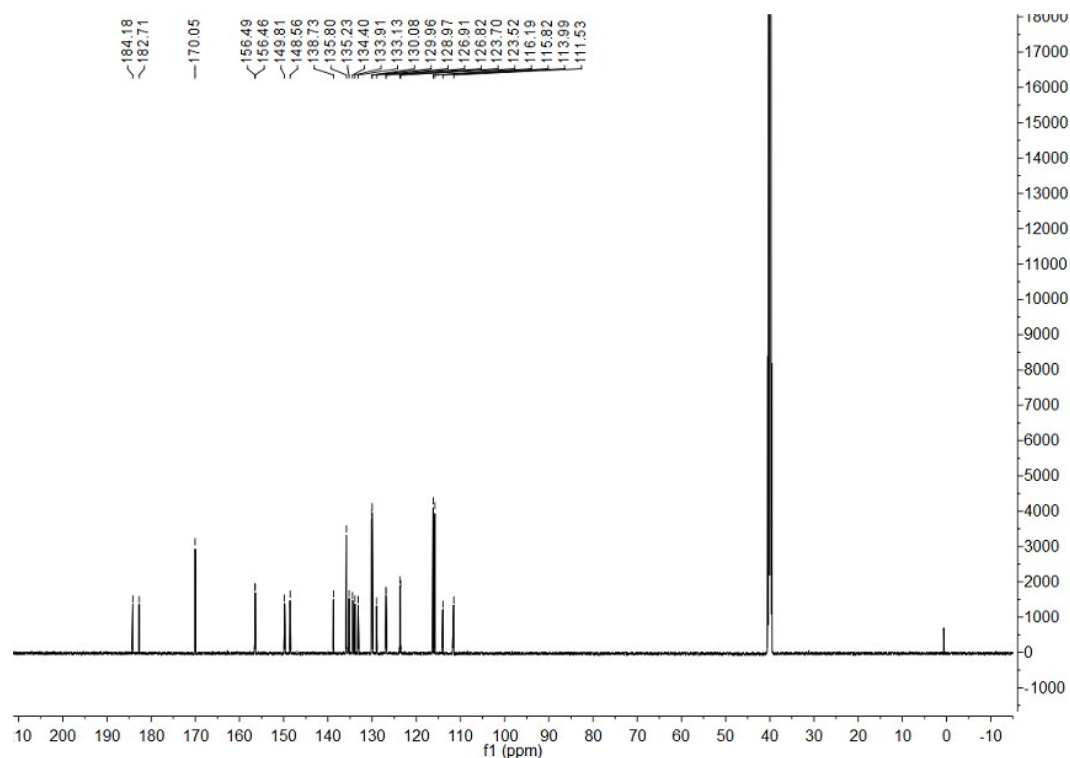

Spectrum from 110-15.wiff (sample 1) - Sample015, Experiment 1, +TOF MS (100 - 2000) from 0.240 min

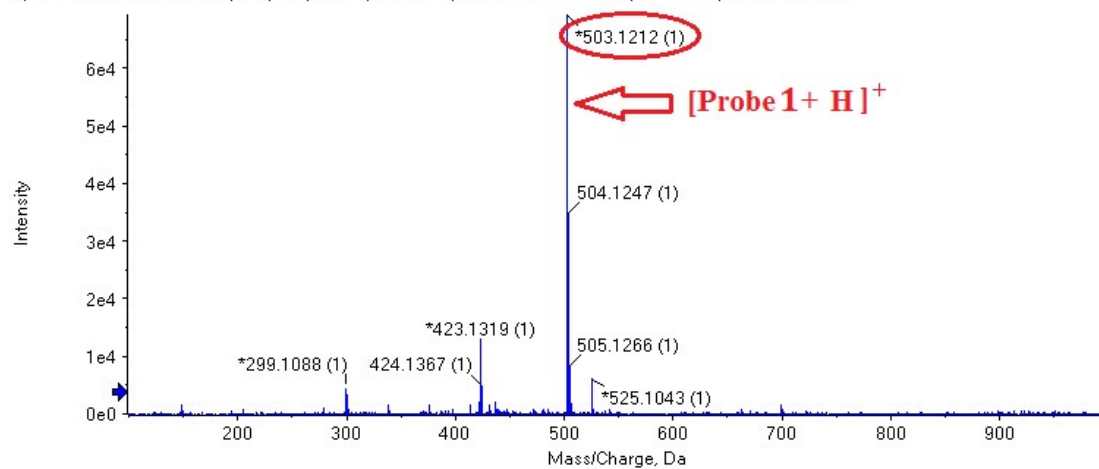

**Figure S2:** The photostabilities of probe **1** and probe **1**-Cys.

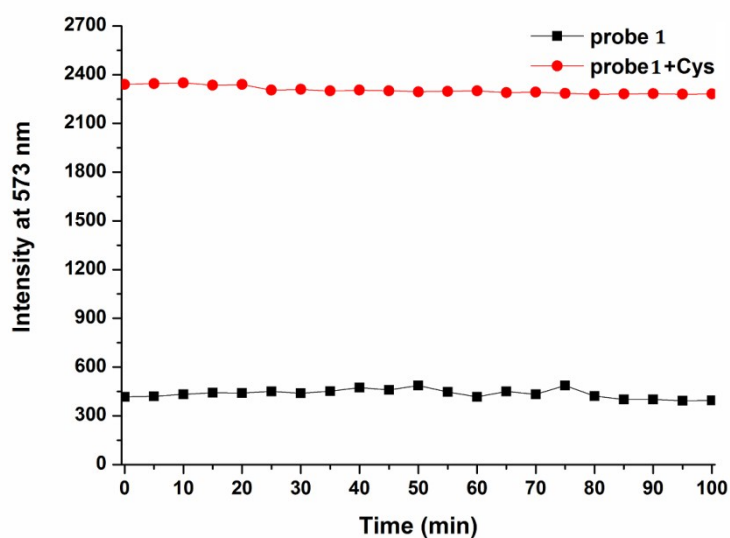

**Fig. S2:** The fluorescence intensity at 573 nm of fluorescent probe **1** (10  $\mu\text{M}$ ) at 573 nm in the absence and presence of Cys (10  $\mu\text{M}$ ) in DMSO: HEPES=1:1(V/V, pH 7.4). Sample was exposed under respective optimal excitation wavelength and fluorescence intensities were measured at 5 min intervals ( $\lambda_{\text{ex}}$  = 455 nm; slit: 10 nm/10 nm).

**Figure S3:** Kinetic study of the response of the probe **1** to Hcy and GSH at 25  $^{\circ}\text{C}$

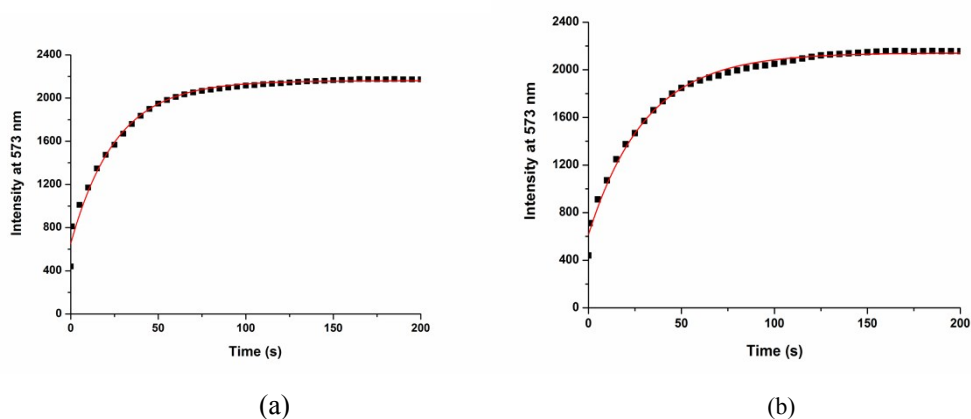

**Fig. S3:** Kinetic study of the response of the probe **1** (10  $\mu\text{M}$ ) to 20 equiv. (a) Hcy and (b) GSH.

**Figure S4:** The detection limits of Cys, Hcy and GSH.

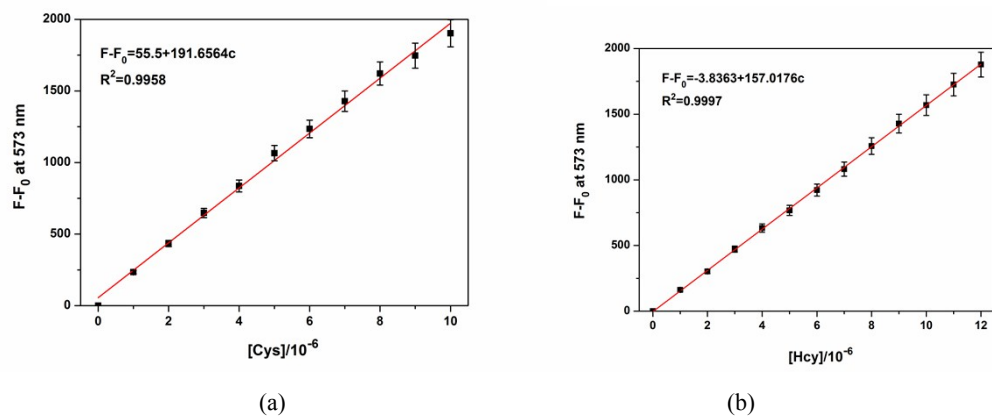

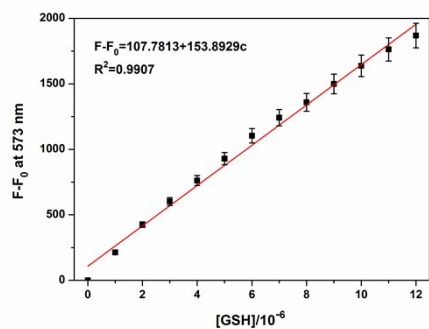

(c)

**Fig. S4:** Plot of the fluorescence intensity at 573 nm as a function of the concentrations of (a) Cys, (b) Hcy and (c) GSH.

**Figure S5:** The ESI-MS of product obtained by reaction between probe **1** and ME.

2+ 151230162037 #25-51 RT: 0.10-0.21 AV: 27 NL: 1.42E6  
T: ITMS + p ESI Full ms [150.00-1000.00]

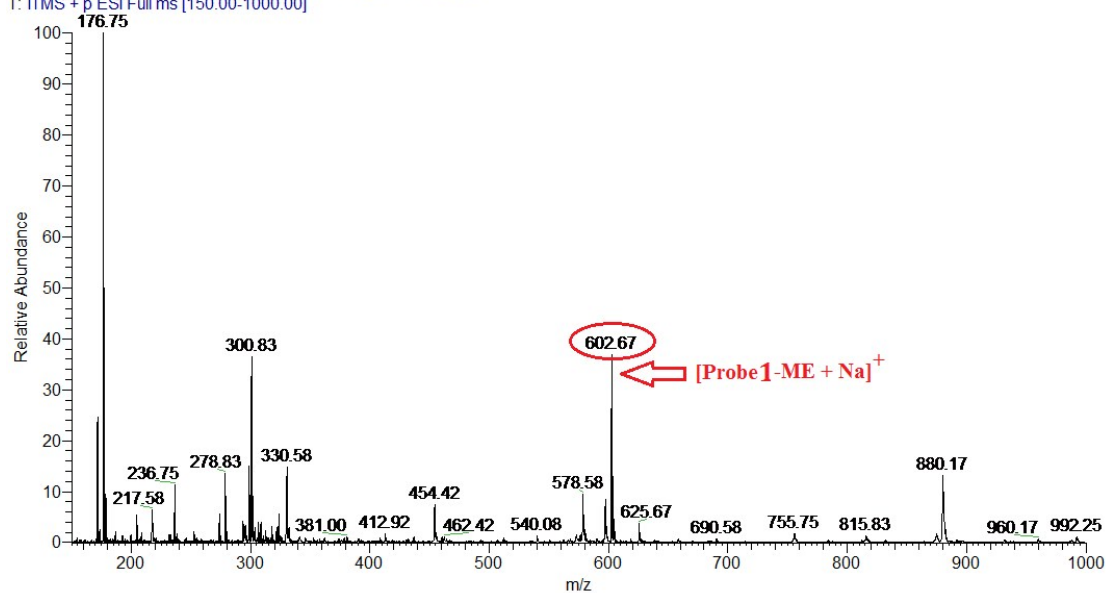

ESI-MS of the probe **1** (ESI+TOF)  $m/z$ :  $[probe\ 1-ME + Na]^+$  Calcd for  $C_{32}H_{24}N_2NaO_7S^+$  603.12, Found 602.67.

**Figure S6:** NMR spectra of the probe **1**-ME.

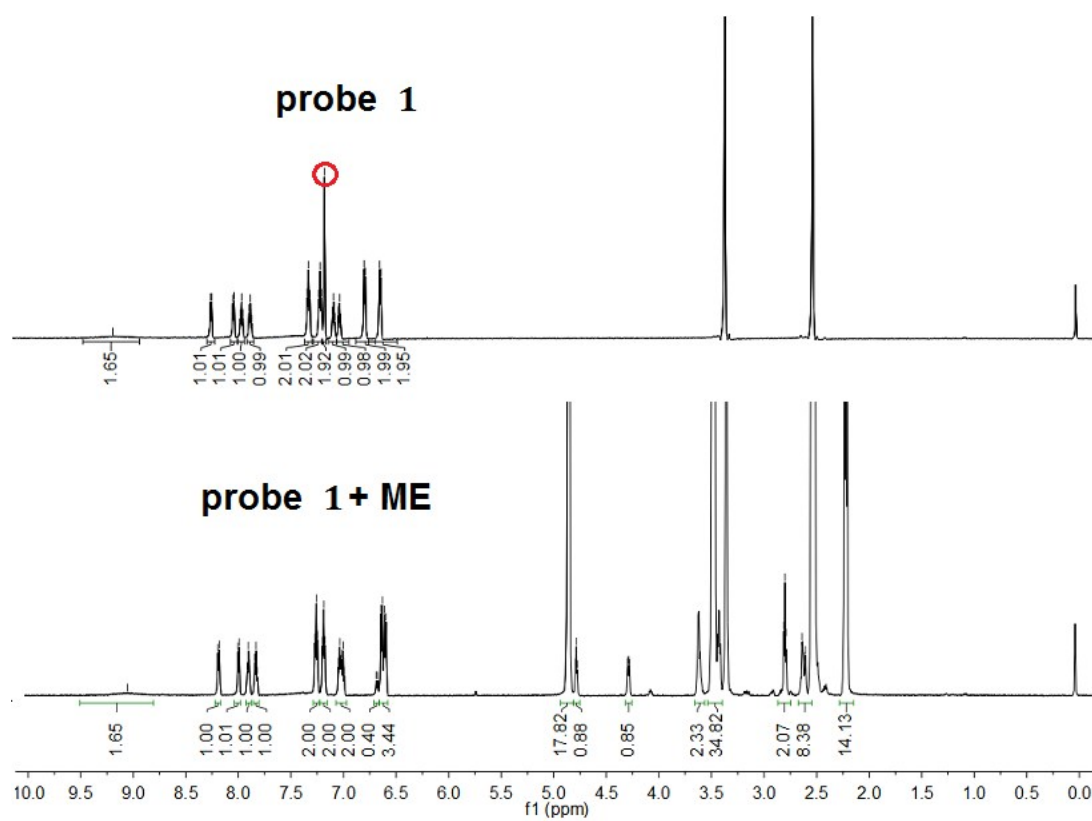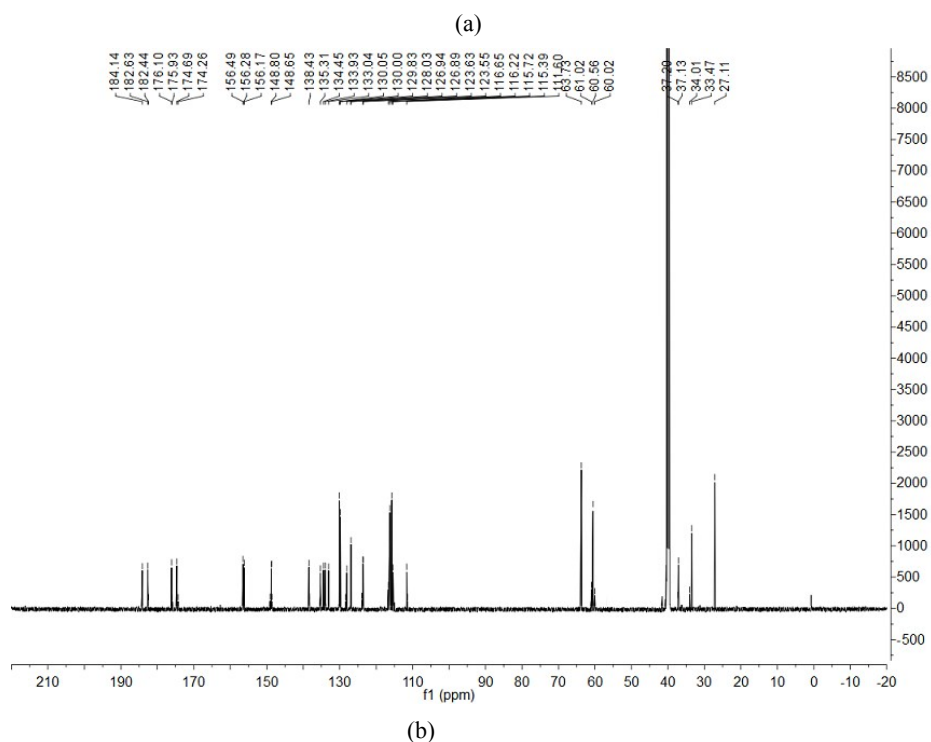

**Fig. S6:** (a)  $^1\text{H}$  NMR (600 MHz) spectra of probe **1** and probe **1**-ME in  $\text{DMSO}-d_6$ . (b)  $^{13}\text{C}$  NMR (150 MHz) spectra of probe **1**-ME in  $\text{DMSO}-d_6$ .
